# Supplementary material for: Synthetic Derivatives against Wild-Type and Non-Wild-Type Sporothrix brasiliensis: In Vitro and In Silico Analyses
Source: MDPI journal article supplement (doi:10.3390/ph15010055), 2022-01-01
Supplement: s1 [file s1]

**Table S1.** *In silico* pharmacokinetics profile of the hydrazone and quinone synthetic derivatives.

| Compounds | Absorption                    |                      |                          |                             |                              | Distribution       |                    |                      | Metabolism           |     |            |      |     |     |     | Excretion               |                      |
|-----------|-------------------------------|----------------------|--------------------------|-----------------------------|------------------------------|--------------------|--------------------|----------------------|----------------------|-----|------------|------|-----|-----|-----|-------------------------|----------------------|
|           | Intestinal absorption (human) | Caco-2 permeability  | P-glycoprotein substrate | P-glycoprotein I inhibition | P-glycoprotein II inhibition | VDss (human)       | Fraction unbounded | BBB permeability     | Substrate            |     | Inhibition |      |     |     |     | Total clearance         | Renal OCT2 substrate |
|           |                               |                      |                          |                             |                              |                    |                    |                      | CYP                  |     |            |      |     |     |     |                         |                      |
|           |                               |                      |                          |                             |                              |                    |                    |                      | 2D6                  | 3A4 | 1A2        | 2C19 | 2C9 | 2D6 | 3A4 |                         |                      |
|           | Numeric (%Absorbed)           | Categorical (Yes/No) | Categorical (Yes/No)     |                             |                              | Numeric (Log L/kg) | Numeric (Fu)       | Categorical (Yes/No) | Categorical (Yes/No) |     |            |      |     |     |     | Numeric (Log ml/min/kg) | Categorical (Yes/No) |
| Itra      | 100                           | Y                    | Y                        | Y                           | Y                            | -0.167             | 0.239              | N                    | N                    | Y   | N          | Y    | Y   | N   | Y   | 0.056                   | N                    |
| Q1        | 96.778                        | Y                    | N                        | Y                           | Y                            | -0.614             | 0                  | N                    | N                    | Y   | N          | Y    | Y   | N   | Y   | 0.058                   | N                    |
| Q2        | 97.050                        | Y                    | Y                        | Y                           | Y                            | -0.515             | 0.04               | N                    | N                    | Y   | N          | Y    | Y   | N   | N   | 0.072                   | N                    |
| Q3        | 97.220                        | Y                    | Y                        | Y                           | Y                            | -0.595             | 0.053              | N                    | N                    | Y   | N          | Y    | Y   | N   | Y   | 0.057                   | N                    |
| Q4        | 88.680                        | N                    | Y                        | Y                           | Y                            | -0.807             | 0.184              | N                    | N                    | Y   | N          | N    | Y   | N   | Y   | 0.037                   | N                    |
| Q5        | 88.515                        | N                    | Y                        | Y                           | Y                            | -0.791             | 0.174              | N                    | N                    | Y   | N          | N    | Y   | N   | Y   | 0.098                   | N                    |
| Q6        | 97.451                        | Y                    | Y                        | Y                           | Y                            | -0.252             | 0.194              | N                    | N                    | Y   | N          | N    | Y   | N   | Y   | 0.039                   | N                    |
| Q7        | 100                           | Y                    | N                        | Y                           | Y                            | -0.312             | 0.153              | N                    | N                    | Y   | N          | N    | Y   | N   | Y   | 0.035                   | N                    |
| Q8        | 100                           | Y                    | Y                        | Y                           | Y                            | -0.347             | 0.274              | N                    | N                    | Y   | N          | N    | N   | N   | N   | -0.926                  | N                    |
| Q9        | 84.812                        | Y                    | Y                        | Y                           | N                            | -0.187             | 0.029              | N                    | N                    | Y   | N          | N    | N   | N   | N   | 0.072                   | N                    |
| Q10       | 100                           | Y                    | Y                        | Y                           | Y                            | -0.574             | 0.196              | N                    | N                    | Y   | N          | Y    | Y   | N   | Y   | -0.045                  | N                    |
| Q11       | 99.261                        | N                    | Y                        | Y                           | Y                            | -0.557             | 0.079              | N                    | N                    | Y   | N          | N    | Y   | N   | Y   | -0.002                  | N                    |
| H1        | 99.261                        | N                    | Y                        | N                           | N                            | -0.317             | 0.286              | N                    | N                    | N   | N          | N    | N   | N   | N   | 0.786                   | N                    |
| H2        | 93.340                        | N                    | N                        | N                           | N                            | -0.231             | 0.386              | N                    | N                    | N   | N          | N    | N   | N   | N   | 0.726                   | N                    |
| H3        | 91.647                        | N                    | N                        | N                           | N                            | -0.169             | 0.324              | Y                    | N                    | N   | Y          | N    | N   | N   | N   | 0.285                   | N                    |

Itra: itraconazole; VDss: volume of distribution; FU: fraction unbounded; BBB: blood brain barrier permeability; Y: yes; N: no; HERG I: Type 1 human ether-a-go-go-related gene; HERG II: Type 1 human ether-a-go-go-related gene.
